# Supplementary material for: Biomass–formic acid–hydrogen conversion process: sustainable production of formic acid from biomass using greenhouse gas
Source: Royal Society of Chemistry journal article supplement (doi:10.1039/d4gc06611a), 2025-01-01
Supplement: d4gc06611a1.pdf [file d4gc06611a1.pdf]

**Supporting Information for:**

**Biomass–formic acid–hydrogen conversion process: Sustainable  
production of formic acid from biomass using greenhouse gas†**

Ju-Hyoung Park,<sup>a</sup> Young-Hoon Noh,<sup>a</sup> Jin Sung Kim,<sup>a</sup> Gyu-Seob Song,<sup>a</sup> Se-Joon Park,<sup>b</sup> Jong Won  
Choi,<sup>c</sup> Young-Chan Choi<sup>a</sup> and Young-Joo Lee<sup>\*a</sup>

<sup>a</sup> Clean Air Research Department, <sup>b</sup> Technology commercialization Team, <sup>c</sup> Energy

Convergence System Research Department, Korea Institute of Energy Research

(KIER), 71-2, Jang-dong, Yuseong-gu, Daejeon 305-343, Republic of Korea

The supporting information file consists of 30 pages, 7 references, 8 figures and 4 Tables.

15 Table S1. Results of hydrolysis-oxidation hydrothermal treatment (HOHT) of biomass via various parameters obtained by HPLC  
16 with RI detector.

| Entry          | Glucose<br>(g/L) | XMG <sup>a</sup><br>(g/L) | Arabinose<br>(g/L) | Acetic<br>acid<br>(g/L) | Levulinic<br>acid<br>(g/L) | 5-HMF<br>(g/L) | Furfural<br>(g/L) | Formic<br>acid<br>(g/L) |
|----------------|------------------|---------------------------|--------------------|-------------------------|----------------------------|----------------|-------------------|-------------------------|
| 1 <sup>b</sup> | -                | -                         | -                  | -                       | -                          | -              | -                 | -                       |
| 2 <sup>c</sup> | 0.31<br>±0.01    | 0.89<br>±0.03             | 0.24<br>±0.01      | 2.44<br>±0.20           | -                          | 0.04<br>±0.01  | 0.37<br>±0.02     | 0.56<br>±0.31           |
| 3 <sup>d</sup> | 0.21<br>±0.01    | 0.17<br>±0.02             | 0.26<br>±0.02      | 10.61<br>±0.42          | 1.03<br>±0.01              | 0.56<br>±0.07  | 0.07<br>±0.01     | 16.32<br>±0.29          |
| 4 <sup>e</sup> | 1.15<br>±0.25    | 2.41<br>±0.17             | -                  | 5.28<br>±0.39           | -                          | 0.61<br>±0.02  | 2.85<br>±0.16     | 1.73<br>±0.08           |
| 5 <sup>f</sup> | 3.41<br>±0.68    | 0.66<br>±0.02             | -                  | 11.67<br>±1.26          | 0.98<br>±0.06              | 2.11<br>±0.03  | 0.78<br>±0.01     | 34.40<br>±0.98          |

|                 |               |               |               |                |               |               |               |                |
|-----------------|---------------|---------------|---------------|----------------|---------------|---------------|---------------|----------------|
| 6 <sup>g</sup>  | 4.52<br>±0.57 | 2.05<br>±0.24 | 0.99<br>±0.03 | 12.14<br>±1.60 | 4.21<br>±0.62 | 1.99<br>±0.10 | 0.80<br>±0.03 | 39.16<br>±1.26 |
| 7 <sup>h</sup>  | 3.13<br>±0.05 | 1.94<br>±0.13 | 0.79<br>±0.05 | 12.46<br>±0.19 | 4.20<br>±0.83 | 1.45<br>±0.02 | 0.69<br>±0.01 | 42.63<br>±0.30 |
| 8 <sup>i</sup>  | 1.30<br>±0.53 | 0.45<br>±0.09 | 0.47<br>±0.07 | 15.00<br>±0.93 | 0.82<br>±0.01 | 1.64<br>±0.17 | 1.02<br>±0.35 | 29.25<br>±1.13 |
| 9 <sup>j</sup>  | 1.82<br>±0.28 | 0.60<br>±0.03 | 0.59<br>±0.21 | 15.06<br>±1.56 | 0.79<br>±0.01 | 2.47<br>±0.54 | 1.26<br>±0.06 | 31.58<br>±0.86 |
| 10 <sup>k</sup> | 1.07<br>±0.04 | 0.44<br>±0.01 | 0.48<br>±0.02 | 15.25<br>±0.62 | 0.99<br>±0.09 | 1.36<br>±0.07 | 0.91<br>±0.02 | 30.04<br>±0.01 |
| 11 <sup>l</sup> | 5.15<br>±2.01 | 1.05<br>±0.08 | 0.79<br>±0.03 | 10.95<br>±0.57 | 0.74<br>±0.01 | 2.86<br>±0.29 | 1.07<br>±0.34 | 25.03<br>±1.08 |
| 12 <sup>m</sup> | 1.42<br>±0.32 | 0.40<br>±0.03 | 0.40<br>±0.01 | 10.82<br>±1.38 | 0.79<br>±0.02 | 1.60<br>±0.50 | 0.83<br>±0.08 | 18.97<br>±0.28 |
| 13 <sup>n</sup> | 7.60<br>±0.01 | 4.87<br>±0.81 | 0.94<br>±0.02 | 8.24<br>±0.74  | 0.33<br>±0.03 | 0.66<br>±0.02 | 1.82<br>±0.27 | 13.72<br>±0.99 |
| 14 <sup>o</sup> | -             | -             | 0.21<br>±0.01 | 13.00<br>±0.35 | 0.58<br>±0.22 | 0.54<br>±0.35 | 0.39<br>±0.01 | 18.30<br>±0.06 |
| 15 <sup>p</sup> | 0.31<br>±0.03 | 0.89<br>±0.17 | -             | 2.37<br>±0.59  | 0.10<br>±0.07 | 0.13<br>±0.02 | 0.81<br>±0.06 | 1.55<br>±0.19  |

|                 |               |               |               |               |               |               |               |                |
|-----------------|---------------|---------------|---------------|---------------|---------------|---------------|---------------|----------------|
| 16 <sup>q</sup> | -             | 0.44<br>±0.40 | 0.29<br>±0.38 | 6.43<br>±0.82 | 0.28<br>±0.01 | 0.22<br>±0.02 | 0.15<br>±0.08 | 6.45<br>±0.17  |
| 17 <sup>r</sup> | 0.52<br>±0.24 | 2.12<br>±0.17 | 0.56<br>±0.04 | 3.50<br>±0.22 | -             | 0.24<br>±0.06 | 2.18<br>±0.28 | 1.89<br>±0.38  |
| 18 <sup>s</sup> | 2.33<br>±0.71 | 1.12<br>±0.24 | 0.75<br>±0.02 | 9.52<br>±0.57 | 0.46<br>±0.33 | 0.74<br>±0.04 | 1.22<br>±0.24 | 14.34<br>±0.98 |
| 19 <sup>t</sup> | 2.92<br>±0.06 | 1.54<br>±0.21 | 0.38<br>±0.09 | 5.47<br>±0.38 | 0.17<br>±0.02 | 0.22<br>±0.01 | 0.10<br>±0.01 | 15.41<br>±0.26 |
| 20 <sup>u</sup> | 2.97<br>±0.39 | 2.23<br>±0.10 | 0.73<br>±0.07 | 8.46<br>±0.08 | 0.38<br>±0.03 | 1.10<br>±0.10 | 1.56<br>±0.82 | 14.23<br>±0.37 |
| 21 <sup>v</sup> | 0.66<br>±0.01 | 2.08<br>±0.46 | 1.55<br>±0.15 | 2.25<br>±0.67 | 0.06<br>±0.01 | 0.16<br>±0.08 | 0.80<br>±0.23 | 0.64<br>±0.01  |
| 22 <sup>w</sup> | 1.78<br>±0.29 | 0.66<br>±0.04 | 0.61<br>±0.03 | 8.05<br>±1.02 | 0.40<br>±0.03 | 0.93<br>±0.58 | 1.57<br>±0.37 | 11.79<br>±0.54 |
| 23 <sup>x</sup> | 0.62<br>±0.07 | 2.39<br>±0.39 | 0.47<br>±0.03 | 3.79<br>±0.07 | -             | 0.60<br>±0.20 | 4.24<br>±0.36 | 2.43<br>±0.05  |
| 24 <sup>y</sup> | 3.90<br>±0.73 | 1.63<br>±0.69 | 0.92<br>±0.05 | 9.28<br>±0.64 | 0.37<br>±0.03 | 0.84<br>±0.01 | 1.91<br>±0.05 | 18.22<br>±0.67 |
| 25 <sup>z</sup> | 2.91<br>±0.17 | 1.15<br>±0.20 | -             | 4.89<br>±0.59 | 2.32<br>±1.02 | 0.25<br>±0.08 | 0.37<br>±0.03 | 18.75<br>±0.39 |

18 <sup>a</sup>: Xylose + Mannose + Galactose

19 <sup>b</sup>: Reaction condition: carbon dioxide 30 bar, and 78.96 g moisture for 3 h at 170 °C

20 <sup>c</sup>: Reaction condition: 10 g of raw red pine, and 78.96 g moisture for 3 h at 170 °C

21 <sup>d</sup>: Reaction condition: 10 g of raw red pine, and H<sub>2</sub>O<sub>2</sub> 11 wt% 78.96 g solution for 3 h at 170 °C

22 <sup>e</sup>: Reaction condition: 10 g of raw red pine, carbon dioxide 10 bar, and 78.96 g moisture for 3 h at 170 °C

23 <sup>f</sup>: Reaction condition: 10 g of raw red pine, carbon dioxide 10 bar, and H<sub>2</sub>O<sub>2</sub> 11 wt% 78.96 g solution for 3 h at 170 °C

24 <sup>g</sup>: Reaction condition: 10 g of raw red pine, carbon dioxide 20 bar, and H<sub>2</sub>O<sub>2</sub> 11 wt% 78.96 g solution for 3 h at 170 °C

25 <sup>h</sup>: Reaction condition: 10 g of raw red pine, carbon dioxide 30 bar, and H<sub>2</sub>O<sub>2</sub> 11 wt% 78.96 g solution for 3 h at 170 °C

26 <sup>i</sup>: Reaction condition: 10 g of raw red pine, and carbon dioxide 30 bar, H<sub>2</sub>O<sub>2</sub> 11 wt% 78.96 g solution for 1 h at 170 °C

- 27 j: Reaction condition: 10 g of raw red pine, carbon dioxide 30 bar, and H<sub>2</sub>O<sub>2</sub> 11 wt% 78.96 g solution for 2 h at 170 °C
- 28 k: Reaction condition: 10 g of raw red pine, carbon dioxide 30 bar, and H<sub>2</sub>O<sub>2</sub> 11 wt% 78.96 g solution for 4 h at 170 °C
- 29 l: Reaction condition: 10 g of raw red pine, carbon dioxide 30 bar, and H<sub>2</sub>O<sub>2</sub> 11 wt% 78.96 g solution for 3 h at 150 °C
- 30 m: Reaction condition: 10 g of raw red pine, carbon dioxide 30 bar, and H<sub>2</sub>O<sub>2</sub> 11 wt% 78.96 g solution for 3 h at 190 °C
- 31 n: Reaction condition: 10 g of raw red pine, carbon dioxide 30 bar, and H<sub>2</sub>O<sub>2</sub> 5.6 wt% 78.96 g solution for 3 h at 170 °C
- 32 o: Reaction condition: 10 g of raw red pine, carbon dioxide 30 bar, and H<sub>2</sub>O<sub>2</sub> 16.8 wt% 78.96 g solution for 3 h at 170 °C
- 33 p: Reaction condition: 10 g of raw corn stover, and 78.96 g moisture for 3 h at 170 °C
- 34 q: Reaction condition: 10 g of raw corn stover, and H<sub>2</sub>O<sub>2</sub> 11 wt% 78.96 g solution for 3 h at 170 °C
- 35 r: Reaction condition: 10 g of raw corn stover, carbon dioxide 10 bar, and 78.96 g moisture for 3 h at 170 °C

36 <sup>s</sup>: Reaction condition: 10 g of raw corn stover, carbon dioxide 30 bar, and H<sub>2</sub>O<sub>2</sub> 11 wt% 78.96 g solution for 3 h at 170 °C

37 <sup>t</sup>: Reaction condition: 10 g of raw corn stover, sulfuric acid 2 wt%, and H<sub>2</sub>O<sub>2</sub> 11 wt% 78.96 g solution for 3 h at 170 °C

38 <sup>u</sup>: Reaction condition: 10 g of ash extracted corn stover, carbon dioxide 30 bar, and H<sub>2</sub>O<sub>2</sub> 11 wt% 78.96 g solution for 3 h at  
39 170 °C

40 <sup>v</sup>: Reaction condition: 10 g of raw wheat stover, and 78.96 g moisture for 3 h at 170 °C

41 <sup>w</sup>: Reaction condition: 10 g of raw wheat stover, and H<sub>2</sub>O<sub>2</sub> 11 wt% 78.96 g solution for 3 h at 170 °C

42 <sup>x</sup>: Reaction condition: 10 g of raw wheat stover, carbon dioxide 30 bar, and 78.96 g moisture for 3 h at 170 °C

43 <sup>y</sup>: Reaction condition: 10 g of raw wheat stover, carbon dioxide 30 bar, and H<sub>2</sub>O<sub>2</sub> 11 wt% 78.96 g solution for 3 h at 170 °C

44 <sup>z</sup>: Reaction condition: 10 g of raw wheat stover, sulfuric acid 2 wt%, and H<sub>2</sub>O<sub>2</sub> 11 wt% 78.96 g solution for 3 h at 170 °C

45 Table S2. Results of Pd content of Pd catalyst supported on hydroxylated and  
46 amine-functionalized mesoporous silica by inductively coupled plasma (ICP)-atomic

| Sample                                        | Pd content<br>(wt%) |
|-----------------------------------------------|---------------------|
| 9 wt% Pd/ NH <sub>2</sub> -OH-KIE-6 catalysts | 9.65                |

47 emission spectroscopy.

48

49 The elemental composition analysis in Table S2 confirms the successful synthesis  
50 of the 9 wt% Pd/NH<sub>2</sub>-OH-KIE-6 catalyst.

51



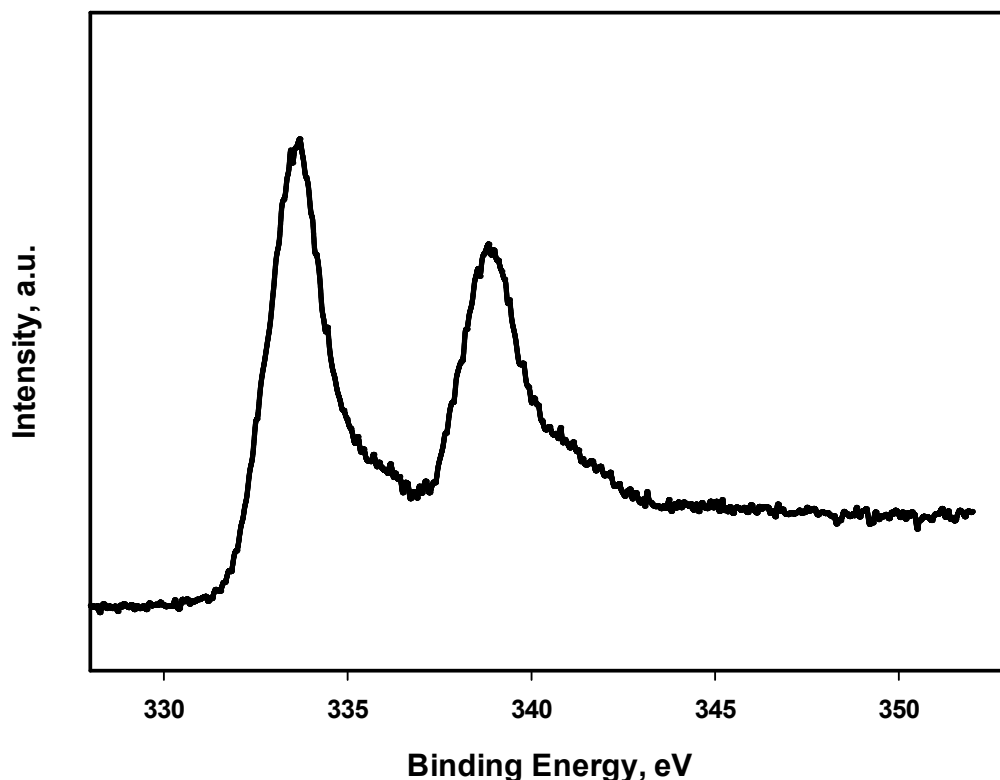

52

53 Figure S1. XPS spectra of 9 wt% Pd/NH<sub>2</sub>-OH-KIE-6 catalysts.

54 The XPS spectra of Pd 3d exhibit binding energy peaks at ~335.1 eV (3d<sub>5/2</sub>) and  
55 ~340.3 eV (3d<sub>3/2</sub>), corresponding to metallic Pd(0), confirming the successful  
56 reduction of Pd species. No peaks associated with Pd(II) species are observed,  
57 indicating that the catalyst remains unoxidized. Additionally, the N 1s XPS spectrum  
58 shows a peak at ~399.8 eV, suggesting strong interactions between Pd  
59 nanoparticles and the NH<sub>2</sub>-functionalized KIE-6 support. This confirms the effective  
60 immobilization of Pd on the support material.

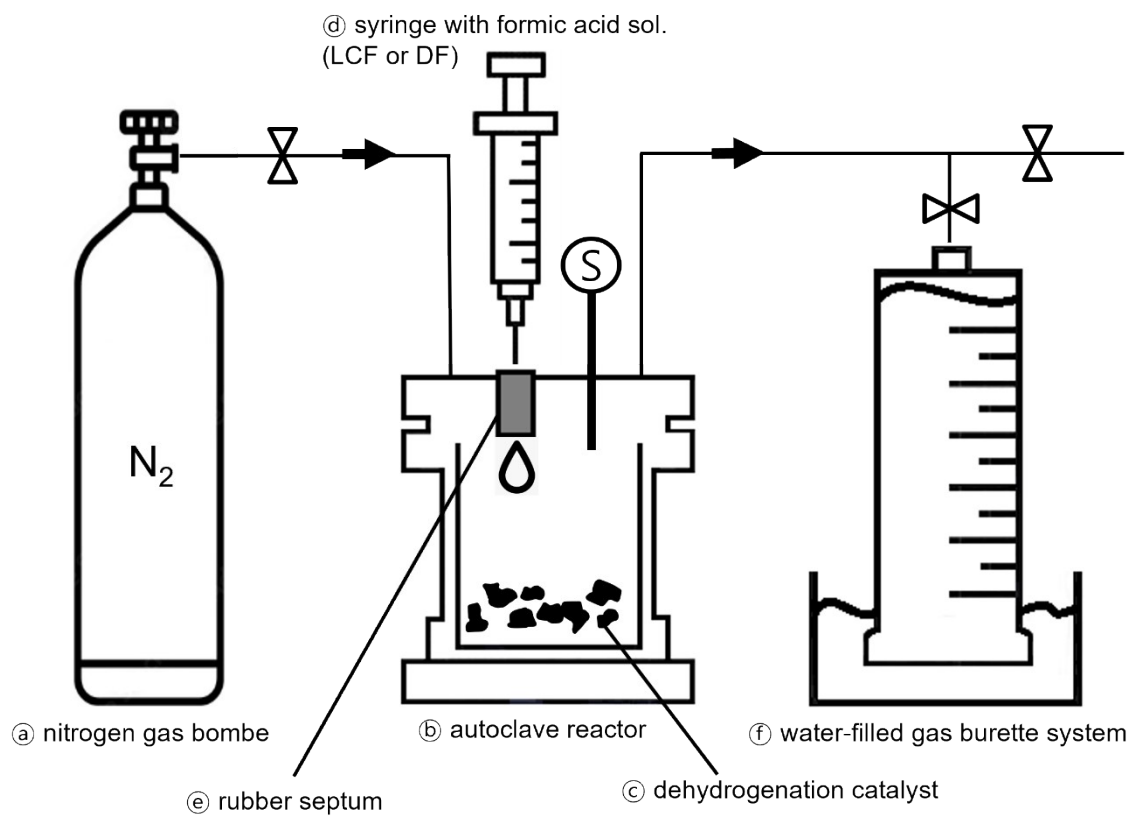

61

62 Figure S2. Formic acid dehydrogenation measurement system.

63

| RetTime<br>[min] | Type | Area<br>[25 uV*s] | Amt/Area   | Amount<br>[%mol/mol] | Grp | Name |
|------------------|------|-------------------|------------|----------------------|-----|------|
| 2.171            | BB   | 1185.37061        | 3.14246e-3 | 3.72498              | H2  |      |
| 3.181            | VB   | 3101.89307        | 2.72899e-2 | 84.65041             | N2  |      |
| 4.765            |      | -                 | -          | -                    | CO  |      |
| 5.271            |      | -                 | -          | -                    | CH4 |      |
| 8.307            | BV   | 98.02250          | 3.14704e-2 | 3.08481              | CO2 |      |

64

65 Figure S3. GC analysis of dehydrogenation gas.

66

|                                               |                                                                                   |                                                                                   |                                                                                   |                                                                                    |                                                                                     |                                                                                     |
|-----------------------------------------------|-----------------------------------------------------------------------------------|-----------------------------------------------------------------------------------|-----------------------------------------------------------------------------------|------------------------------------------------------------------------------------|-------------------------------------------------------------------------------------|-------------------------------------------------------------------------------------|
| Solid image                                   |  |  |  |  |  |  |
| Acid (bar, CO <sub>2</sub> )                  | -                                                                                 | -                                                                                 | 10                                                                                | 10                                                                                 | 20                                                                                  | 30                                                                                  |
| Oxidant (wt%, H <sub>2</sub> O <sub>2</sub> ) | -                                                                                 | 11                                                                                | -                                                                                 | 11                                                                                 | 11                                                                                  | 11                                                                                  |
| Temperature (oC)                              | 170                                                                               | 170                                                                               | 170                                                                               | 170                                                                                | 170                                                                                 | 170                                                                                 |
| Reaction time (h)                             | 3                                                                                 | 3                                                                                 | 3                                                                                 | 3                                                                                  | 3                                                                                   | 3                                                                                   |

67

68 Figure S4. Recovery solid image.

69

70

71

72 **Calculation of net CO<sub>2</sub> reduction from Biomass-Formic acid-**

73 **Hydrogen process using CO<sub>2</sub>**

74 ***1. Mass balance for producing 1 ton hydrogen***

75 In this study, carbon dioxide emissions were calculated based on using red pine,  
76 which had the highest formic acid conversion yield. Red pine requires 67,831 kg,  
77 and the chemicals required for the reaction are 476,678 kg of water, 58,915 kg of  
78 hydrogen peroxide, and 182,600 kg of carbon dioxide. After the reaction at 170 °C,  
79 22,832 kg of formic acid was produced in the solution. It was assumed that 100 %  
80 of formic acid was recovered after distillation. Formic acid was converted into 1,000  
81 kg of hydrogen and 21,832 kg of carbon dioxide by the dehydrogenation catalytic  
82 reaction. At this time, the reactions of other organic acids were not considered.

83

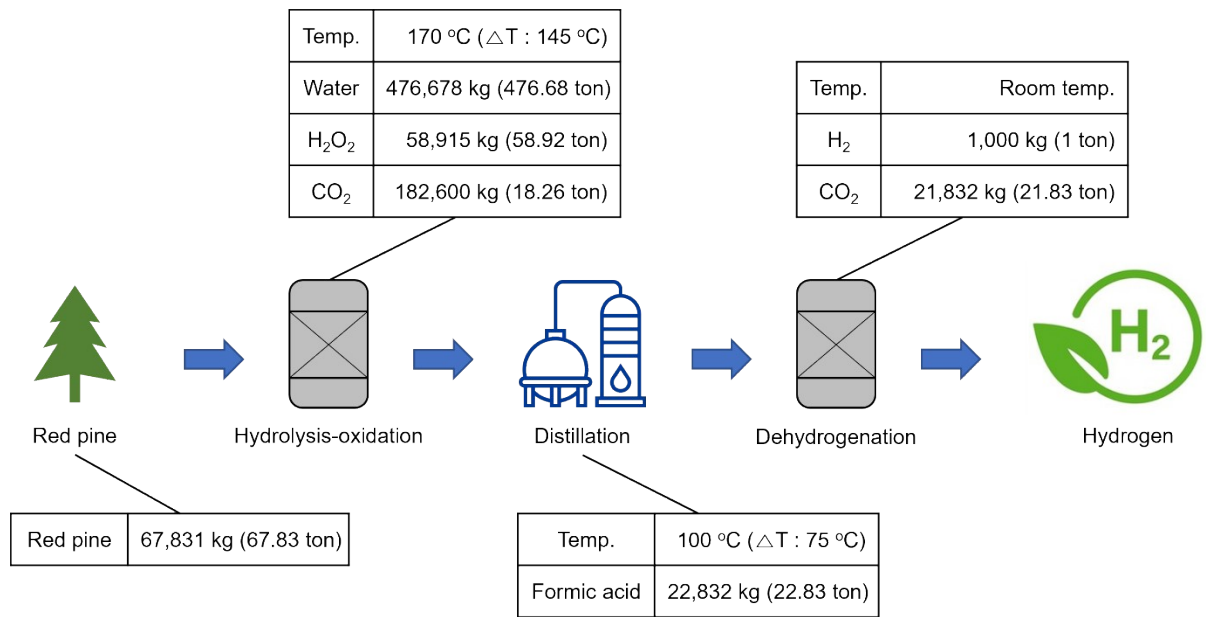

84

85 Figure S5. Mass balance of the Biomass-Formic acid-Hydrogen process using CO<sub>2</sub>.

86

88 **2. Calculation of CO<sub>2</sub> emission by hydrolysis-oxidation process**

89 The amount of energy required for the hydrolysis-oxidation process of biomass  
90 was calculated. The amount of energy required for each component to reach 170  
91 °C was calculated.

92

93 1) Biomass = 67,831 kg x 0.359 kcal/kg°C x 145 °C = 3,530,941 kcal

94 red pine specific heat = 0.359 kcal/kg°C [1]

95

96 2) water = 476,678 kg x 1 kcal/kg°C x 75 °C + 476,678 kg x 539.7 kcal/kg =

97 293,013,975 kcal

98 water specific heat = 1 kcal/kg°C

99 water latent heat = 539.7 kcal/kg

100

101

102 3)  $\text{H}_2\text{O}_2 = 58,915 \text{ kg} \times 0.626 \text{ kcal/kg}^\circ\text{C} \times 145^\circ\text{C} = 5,347,738 \text{ kcal}$

103  $\text{H}_2\text{O}_2$  specific heat =  $0.626 \text{ kcal/kg}^\circ\text{C}$  [2]

104

105 4)  $\text{H}_2\text{O}_2$  decomposition heat =  $58,915 \text{ kg} \times -689.41 \text{ kcal/kg} = -40,616,890 \text{ kcal}$

106  $\text{H}_2\text{O}_2$  decomposition heat =  $-689.41 \text{ kcal/kg}$  [3]

107 Since hydrogen peroxide decomposes during the reaction and releases heat, the  
108 heat amount for this was taken into consideration.

109

110 5)  $\text{CO}_2 = 182,600 \text{ kg} \times 0.199 \text{ kcal/kg}^\circ\text{C} \times 145^\circ\text{C} = 5,268,931 \text{ kcal}$

111  $\text{CO}_2$  specific heat =  $0.199 \text{ kcal/kg}^\circ\text{C}$  [4]

112

113 6) Total 266,544,695 kcal

114

115



116 7) Use LNG for process energy

117 LNG Gross calorific value = 13,080 kcal/kg

118 LNG usage = 266,544,695 kcal / 13,080 kcal/kg = 20,378 kg

119

120 8) CO<sub>2</sub> emission calculation

121 Total calorific value = 20,378 kg (LNG usage) X 49.4 MJ/kg (net calorific value) =

122 1,006,673.2 MJ

123 Carbon emission = Calorific value x Carbon emission factors / 1,000,000 =

124 1,006,673.2 MJ x 15.281 tC/TJ / 1,000,000 = 15.38297 tC/TJ

125 CO<sub>2</sub> emission = Carbon emission x 44/12 = 15.38297 tC/TJ x 44 / 12 = 56.40

126 tonCO<sub>2</sub>

127

128

129 **3. Calculation of CO<sub>2</sub> emission by distillation process**

130 Since the specific heat of 5-HMF is not known, it is not accurate to calculate the  
131 amount of heat required to heat each component. Therefore, the total liquid  
132 produced was assumed to be water and the amount of heat required for distillation  
133 was calculated conservatively. The volume of liquid was calculated as 535,593 kg,  
134 which is the sum of water and hydrogen peroxide.

135

136 1) water distillation =  $535,593 \text{ kg} \times 1 \text{ kcal/kg}^\circ\text{C} \times 75^\circ\text{C} + 535,593 \text{ kg} \times 539.7 \text{ kcal/kg}$   
137 = 329,229,186 kcal

138

139 2) Use LNG for process energy

140 LNG Gross calorific value = 13,080 kcal/kg

141 LNG usage =  $329,229,186 \text{ kcal} / 13,080 \text{ kcal/kg} = 25,170 \text{ kg}$

142

143

144 3) CO<sub>2</sub> emission calculation

145 Total calorific value = 25,170 kg (LNG usage) X 49.4 MJ/kg (net calorific value) =

146 1,243,398 MJ

147 Carbon emission = Calorific value x Carbon emission factors / 1,000,000 = 1,243,398

148 MJ x 15.281 tC/TJ / 1,000,000 = 19.00036 tC/TJ

149 CO<sub>2</sub> emission = Carbon emission x 44/12 = 19.00036 tC/TJ x 44 / 12 = 69.67

150 tonCO<sub>2</sub>

151

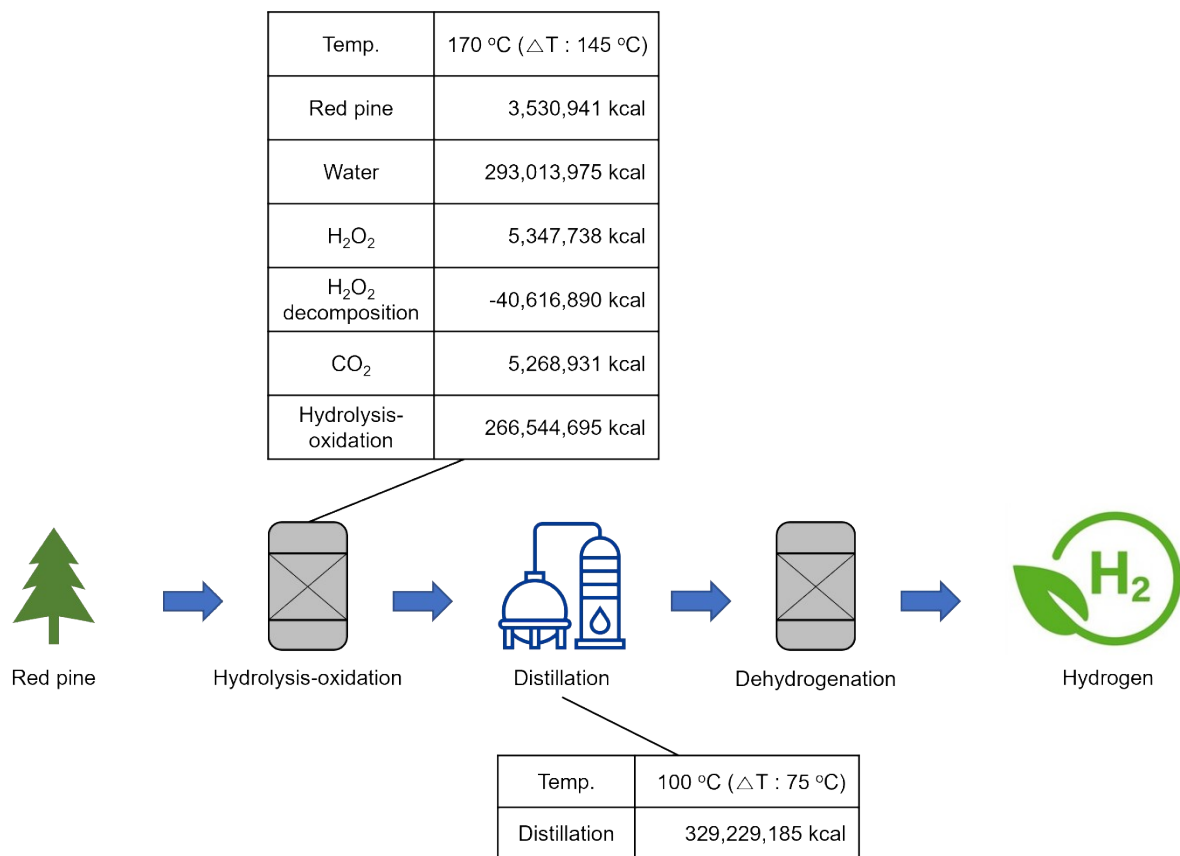

152

153 Figure S6. Calculation of the energy requirement for each unit process.

154

155

156 **4. Calculation of CO<sub>2</sub> reduction by red pine growing**

157 Growth rate of red pine = 20 m<sup>3</sup>/ha [5]

158 Density of red pine = 510 kg/m<sup>3</sup> [6]

159 Weight red pine per ha = 20 m<sup>3</sup> x 510 kg/m<sup>3</sup> = 10,200 kgRed pine/ha = 10.2

160 tonRed pine/ha

161 CO<sub>2</sub> adsorption of red pine = 23 ton CO<sub>2</sub>/ha [5]

162 CO<sub>2</sub> adsorption per 1 ton red pine = 23 ton CO<sub>2</sub> CO<sub>2</sub>/ha / 10.2 tonRed pine/ha=

163 2.25 tonCO<sub>2</sub>/tonRed pine

164 CO<sub>2</sub> adsorption of used red pine for Biomass-Formic acid-Hydrogen process =

165 67.83 ton x 2.25 tonCO<sub>2</sub>/tonRed pine = 152.95 tonCO<sub>2</sub>

166

167

168 ***5. Calculation of CO<sub>2</sub> reduction by hydrolysis-oxidation process using CO<sub>2</sub>***

169 Solubility of CO<sub>2</sub> = 1.45gCO<sub>2</sub>/L = 0.00000145 ton CO<sub>2</sub>/L [7]

170 Dissolution amount of CO<sub>2</sub> for Biomass-Formic acid-Hydrogen process =

171 0.00000145 ton CO<sub>2</sub>/L x 67.83 ton = 0.78 tonCO<sub>2</sub>

172

173 ***6. Calculation of CO<sub>2</sub> reduction from Biomass-Formic acid-Hydrogen process***

174 ***using CO<sub>2</sub> process per ton of hydrogen production***

175 1) CO<sub>2</sub> emission

176 Hydrolysis-oxidation process 56.4 tonCO<sub>2</sub>

177 Distillation process 69.67 tonCO<sub>2</sub>

178 Dehydrogenation process 21.83 tonCO<sub>2</sub>

179 Total 147.90 tonCO<sub>2</sub>

180

181 2) CO<sub>2</sub> reduction

182 Red pine growing 152.95 tonCO<sub>2</sub>

183 Hydrolysis-oxidation process 0.78 tonCO<sub>2</sub>

184 Total 153.73 tonCO<sub>2</sub>

185

186

187 3) Net CO<sub>2</sub> reduction

188 CO<sub>2</sub> emission - CO<sub>2</sub> reduction = -5.83 tonCO<sub>2</sub>/tonH<sub>2</sub>

189

190



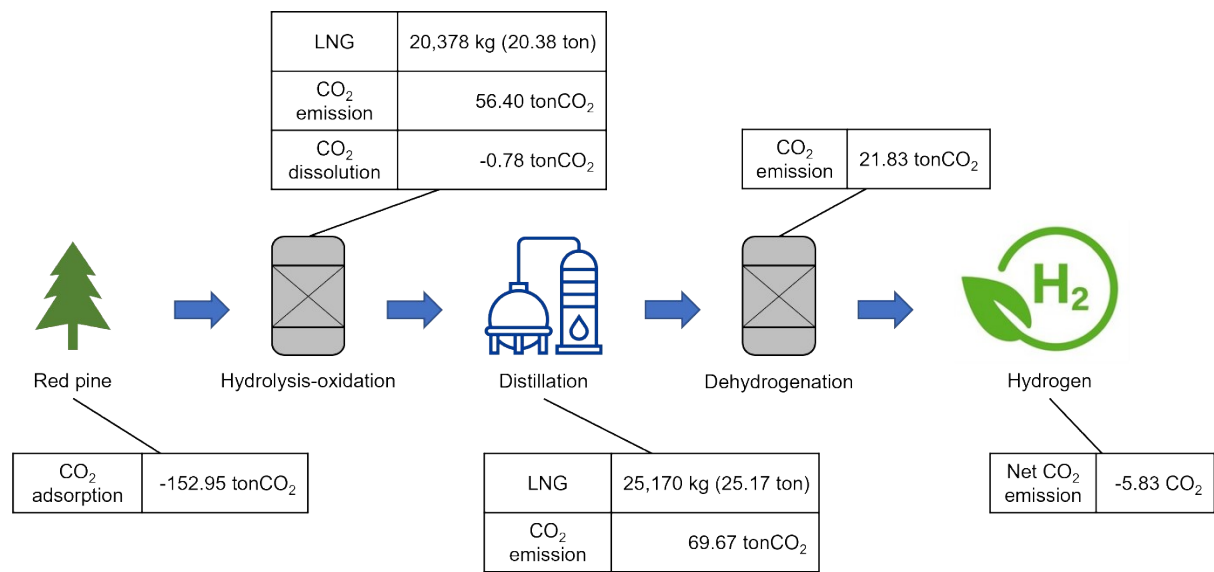

191

192 Figure S7. Calculation of carbon dioxide emission per 1 ton of hydrogen production

193 by Biomass-Formic acid-Hydrogen process using CO<sub>2</sub>.

194

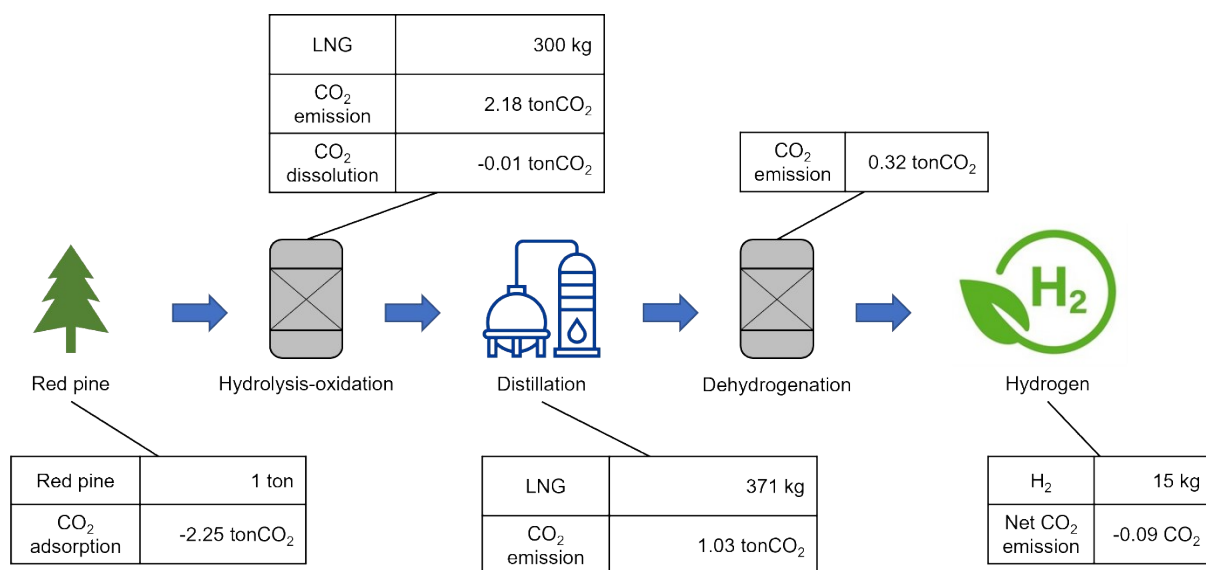

195

196 Figure S8. Calculation of carbon dioxide emission per 1 ton of red pine feedstock  
 197 by Biomass-Formic acid-Hydrogen process using CO<sub>2</sub>.

198

## 199 **Formic acid empirical correlation**

200 We established the empirical correlation of Equation 3 using ChatGPT 4o version.

201 We input all data related to biomass composition (Table 1), formic acid conversion

202 conditions (carbon dioxide 30 bar, and H<sub>2</sub>O<sub>2</sub> 11 wt% solution for 3 h at 170 °C

203 conditions), formic acid concentration (red pine: 42.63 g/L (Table 2 entry 7), corn

204 stover: 14.34 g/L (Table 3 entry 4), wheat stover: 18.22 g/L (Table 4 entry 4), and

205 formic acid production yield (red pine: 36.18 % (Table 2 entry 7), corn stover: 17.43

206 % (Table 3 entry 4), wheat stover: 20.45 % (Table 4 entry 4). Based on this data, we

207 requested an empirical correlation that predicts formic acid yield according to

208 biomass composition. ChatGPT defined the formic acid yield empirical correlation

209 using linear regression analysis. The initial empirical correlation included a formula

210 with the lignin content variable. However, according to our study, formic acid

211 cannot be produced from lignin, so we requested a revised empirical correlation

212 excluding lignin. Finally, the Equation 3 presented in the manuscript was proposed.

213 We reviewed the formic acid yield calculations for all biomass compositions by

214 applying the respective X values to this formula.

215 Table S3. Comparison of empirical correlation value with experimental data for  
 216 formic acid yield

|              | Experimental data<br>(FA yield, %) | Empirical correlation<br>value (%) | Relative error<br>(%) |
|--------------|------------------------------------|------------------------------------|-----------------------|
| Red pine     | 36.18                              | 36.36                              | 0.50                  |
| Corn stover  | 17.43                              | 17.58                              | 0.84                  |
| Wheat stover | 20.45                              | 20.62                              | 0.81                  |

217

218 **Information of reagents**

219 Table S4. Information of reagents

| Reagents                               | Brand                          | Purity |
|----------------------------------------|--------------------------------|--------|
| Sulfuric acid                          | Sigma Aldrich                  | 98 %   |
| CO <sub>2</sub> gas                    | Jaeil Gas Industry             | 99.9%  |
| Hydrogen peroxide                      | SAMCHUN                        | 34.5 % |
| Tetraethyl orthosilicate (TEOS)        | Sigma Aldrich                  | 98 %   |
| Ethanol                                | EMSURE ACS, ISO, Reag. Ph Eur, | 99.9 % |
| Ammonia                                | JUNSEI                         | 28 %   |
| Glycerol                               | DUKSAN                         | 99 %   |
| Hydrochloric acid                      | Sigma Aldrich                  | 37 %   |
| 3-aminopropyl trimethoxysilane (APTMS) | Sigma Aldrich                  | 97 %   |
| Palladium nitrate hydrate              | Sigma Aldrich                  | -      |
| Sodium borohydride                     | SAMCHUN                        | 98 %   |
| Sodium formate                         | Sigma Aldrich                  | 99 %   |
| Cellulose                              | Sigma Aldrich                  | 95 %   |
| Xylan from beechwood                   | Sigma Aldrich                  | 90%    |

221 [1] [https://www.engineeringtoolbox.com/specific-heat-capacity-d\\_391.html](https://www.engineeringtoolbox.com/specific-heat-capacity-d_391.html)

222 [2] [https://en.wikipedia.org/wiki/Hydrogen\\_peroxide](https://en.wikipedia.org/wiki/Hydrogen_peroxide)

223 [3] [https://en.wikipedia.org/wiki/Hydrogen\\_peroxide](https://en.wikipedia.org/wiki/Hydrogen_peroxide)

224 [4] [https://en.wikipedia.org/wiki/Carbon\\_dioxide\\_\(data\\_page\)](https://en.wikipedia.org/wiki/Carbon_dioxide_(data_page))

225 [5] J. Pojola, L. Valsta, K. Mononen: Costs of carbon sequestration in Scots pine

226 stands in Finland. Scandinavian Forest Economics. 2004, 40, 81-90.

227 [6] [https://www.engineeringtoolbox.com/wood-density-d\\_40.html](https://www.engineeringtoolbox.com/wood-density-d_40.html)

228 [7]

229 [https://ko.wikipedia.org/wiki/%EC%9D%B4%EC%82%B0%ED%99%94\\_%ED%83%84%E](https://ko.wikipedia.org/wiki/%EC%9D%B4%EC%82%B0%ED%99%94_%ED%83%84%E)

230 C%86%8C

231
